# Supplementary material for: Electrospun Fibrous Nanocomposite Sensing Materials for Monitoring Biomarkers in Exhaled Breath
Source: MDPI journal article supplement (doi:10.3390/polym15081833), 2023-04-10
Supplement: s1 [file s1]

## Supporting Information

# Electrospun Fibrous Nanocomposite Sensing Materials for Monitoring Biomarkers in Exhaled Breath

Yin-Hsuan Chang <sup>1</sup>, Ting-Hung Hsieh <sup>1</sup>, Kai-Chi Hsiao <sup>1</sup>, Ting-Han Lin <sup>1</sup>,  
Kai-Hsiang Hsu <sup>2,\*</sup> and Ming-Chung Wu <sup>1,2,3,\*</sup>

<sup>1</sup> Department of Chemical and Materials Engineering, Chang Gung University,  
Taoyuan 33302, Taiwan

<sup>2</sup> Division of Pediatric Neonatology, Department of Pediatrics, Chang Gung  
Memorial Hospital, Linkou, Taoyuan 33305, Taiwan

<sup>3</sup> Green Technology Research Center, Chang Gung University,  
Taoyuan 33302, Taiwan

\* Correspondence: khsu@cgmh.org.tw (K.-H.H.);  
mingchungwu@cgu.edu.tw (M.-C.W.)

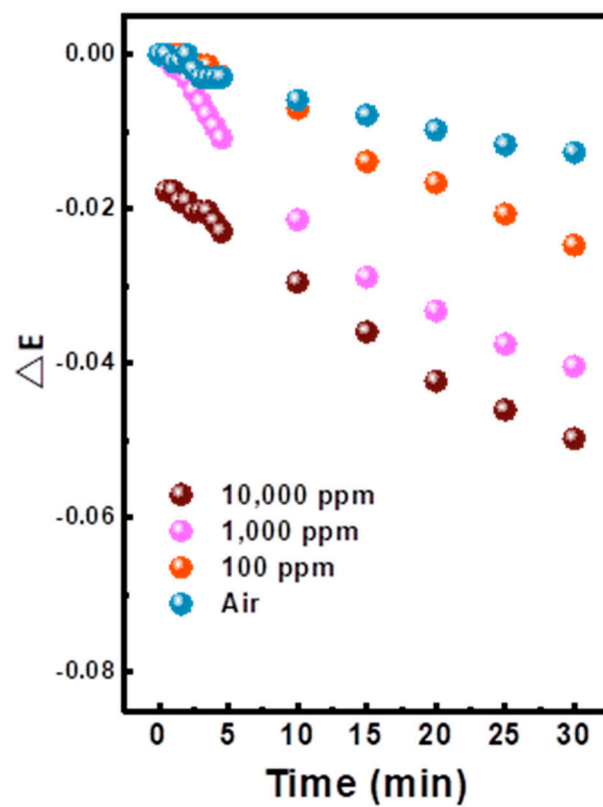

**Figure S1** Extinction changes of Ag/PMMA fibers sensing materials when exposed to various concentrations of acetone.

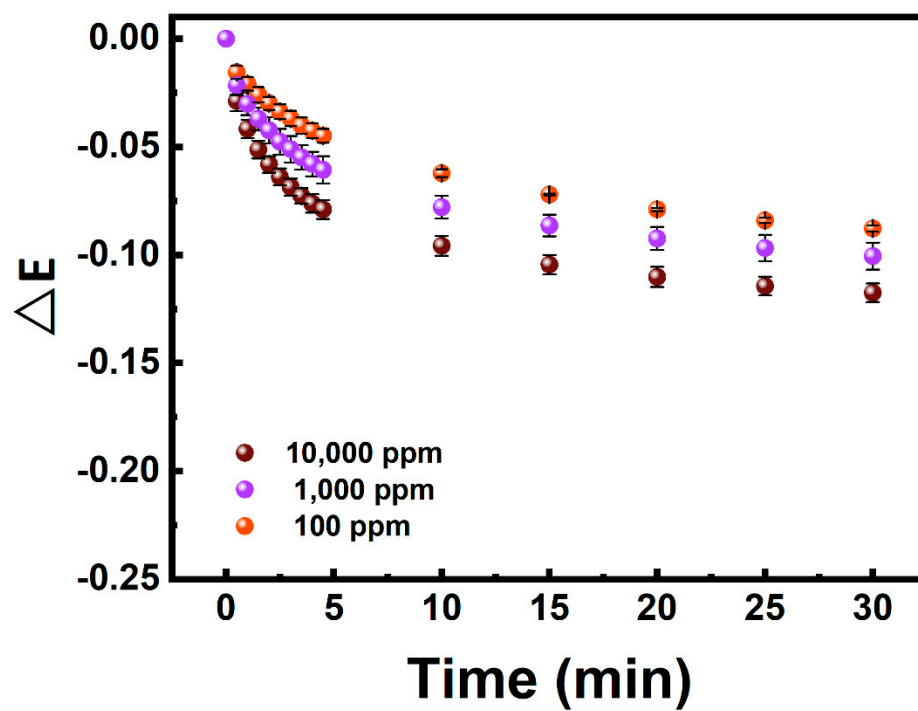

**Figure S2.** Repeatability of the  $\text{WO}_3/\text{SnO}_2/\text{Ag}/\text{PMMA}$  sensing materials exposed to acetone with various concentration.
